# Supplementary material
Source: Springer Nature journal article supplement (https://www.springermedizin.de/resource/supplementary/12967_2012_999_MOESM3_ESM.pdf/9573276)

**A****2 days****4 days****6 days**

SC E1 E2 E1/2 SC E1 E2 E1/2 SC E1 E2 E1/2

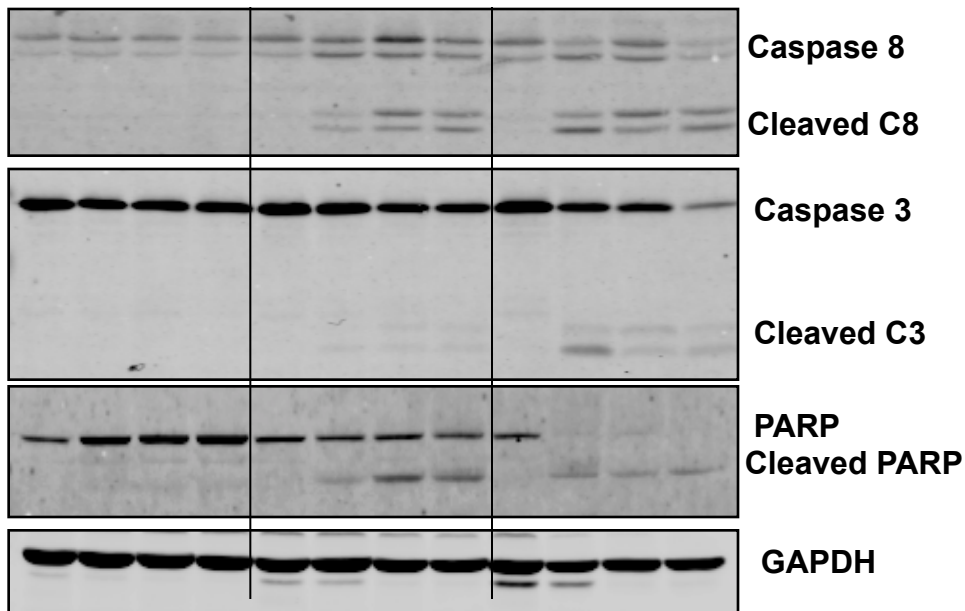**B**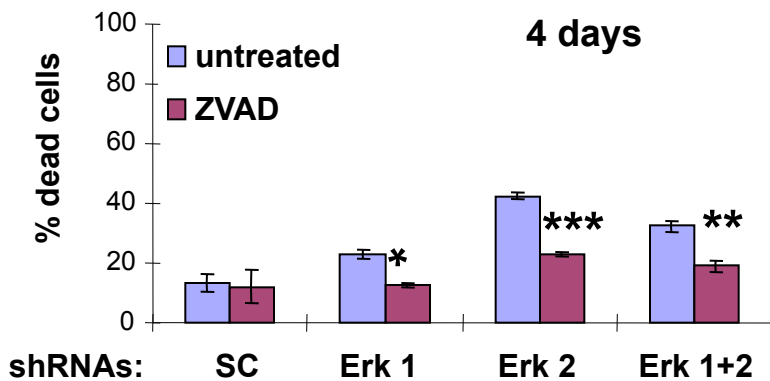

Supplement: MOESM3 [file 9573276]
